# Supplementary material for: A self-powered sandwich-structured scaffold with dual-electroactive properties to regenerate damaged intervertebral discs after discectomy
Source: Royal Society of Chemistry journal article supplement (doi:10.1039/d5tb00100e), 2025-01-01
Supplement: d5tb00100e1.pdf [file d5tb00100e1.pdf]

## Supporting Information

### Self-powered Sandwich-structured Scaffold with Dual-electroactive Properties to Regenerate Damaged Intervertebral Discs after Discectomy

Jing Wang<sup>1#</sup>, Leizhen Huang<sup>1#</sup>, Tao Guo<sup>2</sup>, Zheng Liu<sup>1</sup>, Huilun Xu<sup>1</sup>, Hao Yang<sup>1</sup>, Limin Liu<sup>1</sup>, Ganjun Feng<sup>1\*</sup>, Li Zhang<sup>1\*</sup>

1. Analytical Testing Center, Department of Orthopedic Surgery and Orthopedic Research Institute, West China Hospital, Sichuan University, Chengdu 610065, China
2. Department of Orthopedic Surgery, Guizhou Provincial People's Hospital, Guiyang 550002, China

<sup>#</sup> The two authors contributed equally to the work.

<sup>\*</sup> Corresponding authors

E-mail address: nic1976@scu.edu.cn (Li Zhang); gjfenghx@wchscu.cn (Ganjun Feng)

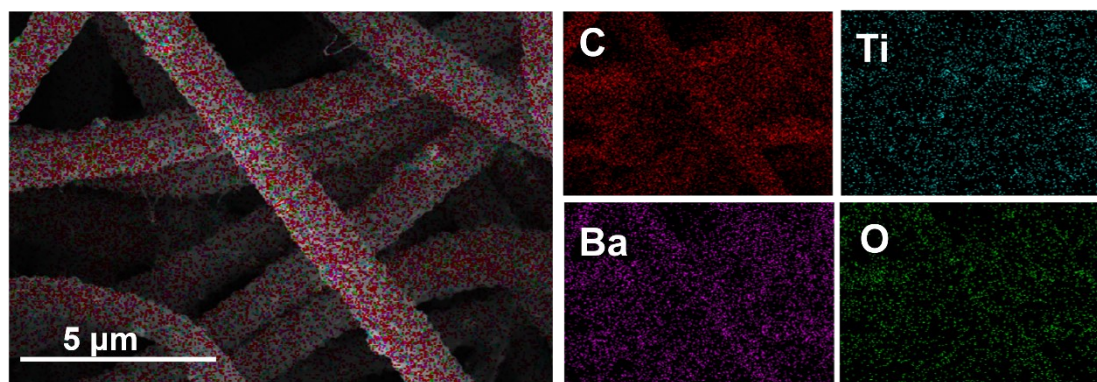

Figure S1 EDS mapping of B5 fibrous membrane.

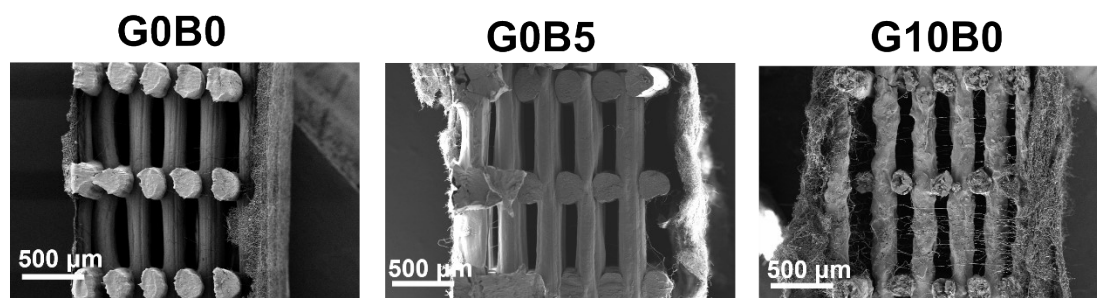

Figure S2 The cross-section SEM images of G0B0, G0B5, and G10B0.

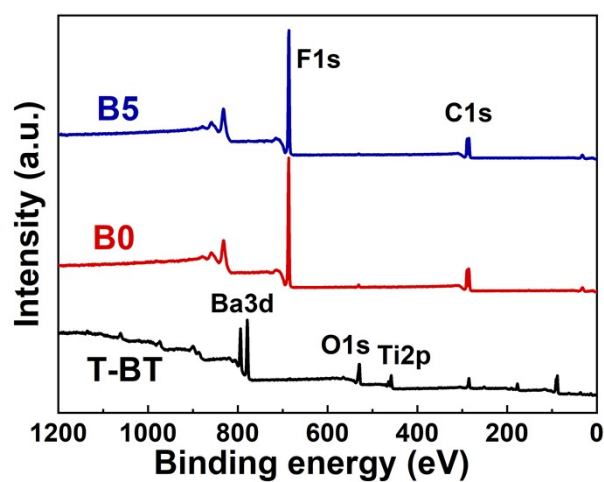

**Figure S3** XPS spectra of T-BT nanoparticles as well as B0 and B5 fibrous membranes.

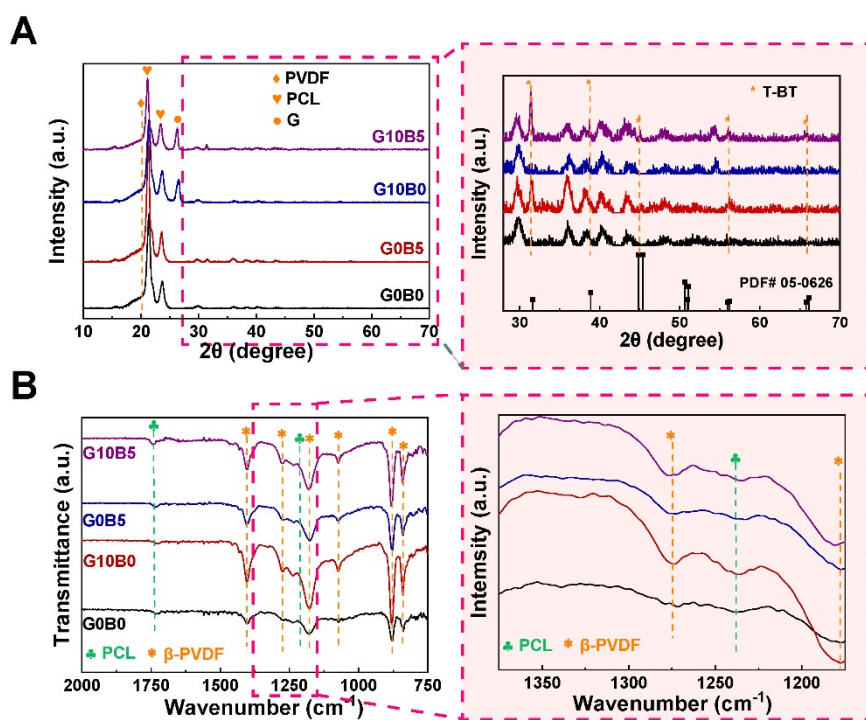

**Figure S4** XRD patterns (A) and FT-IR spectra (B) of different sandwich-structured scaffolds.

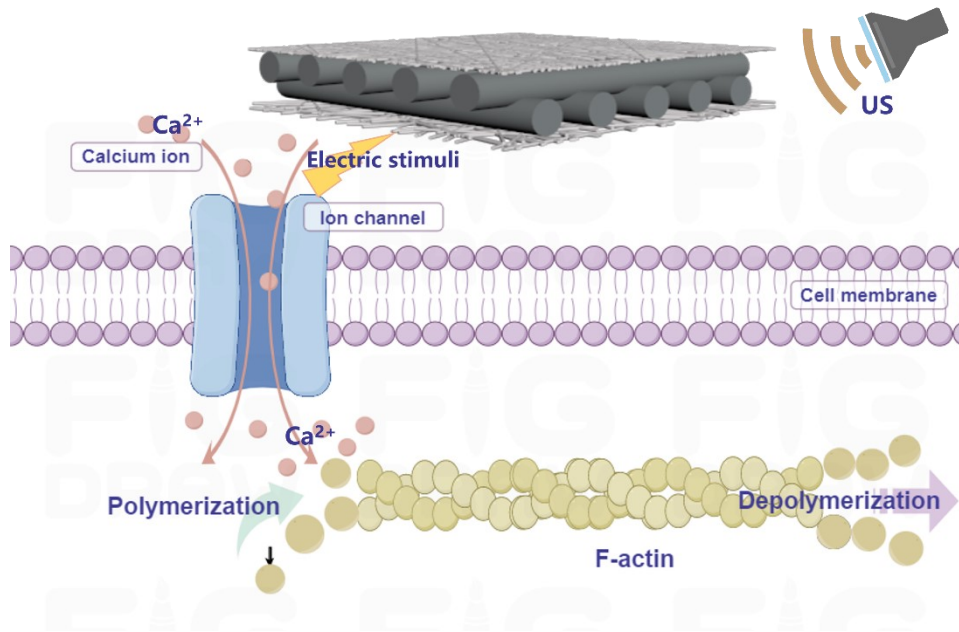

**Figure S5** The schematic illustrating the underlying mechanisms of the G10B5 dual-electroactive scaffold promoting cell adhesion and migration under US treatment.
